# Supplementary material for: Hydrophilic Interaction Liquid Chromatography–Hydrogen/Deuterium Exchange–Mass Spectrometry (HILIC-HDX-MS) for Untargeted Metabolomics
Source: MDPI journal article supplement (doi:10.3390/ijms25052899), 2024-03-01
Supplement: s1 [file s1]

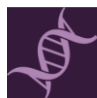

## Supplementary Materials

# Hydrophilic Interaction Liquid Chromatography–Hydrogen/Deuterium Exchange–Mass Spectrometry (HILIC-HDX-MS) for Untargeted Metabolomics

Tomas Cajka <sup>1,\*</sup>, Jiri Hricko <sup>1</sup>, Stanislava Rakusanova <sup>1</sup>, Kristyna Brejchova <sup>1</sup>, Michaela Novakova <sup>1</sup>, Lucie Rudl Kulhava <sup>1</sup>, Veronika Hola <sup>1</sup>, Michaela Paucova <sup>1</sup>, Oliver Fiehn <sup>2</sup>, Ondrej Kuda <sup>1</sup>

<sup>1</sup> Institute of Physiology of the Czech Academy of Sciences, Videnska 1083, 14200 Prague, Czech Republic

<sup>2</sup> West Coast Metabolomics Center, University of California, Davis, 451 Health Sciences Drive, Davis, CA 95616, USA

\* Correspondence: tomas.cajka@fgu.cas.cz

**Figure S1.** Extracted ion chromatograms of an unknown metabolite (4.3 min;  $m/z$  188.1757) detected in different biological matrices and of different origins (rat, mouse, human).

**Figure S2.** Extracted ion chromatograms (EICs) and MS1 and MS/MS spectra of  $N^1$ -acetylspermidine in rat feces under conventional HILIC-MS and full HILIC-HDX-MS conditions. In HILIC-MS, the EIC at  $m/z$  188.1757, corresponding to  $[M(H_4)+H]^+$ , is displayed. Conversely, in HILIC-HDX-MS, the EIC at  $m/z$  193.2071, corresponding to  $[M(D_4)+D]^+$ , is shown. MS/MS spectra were acquired at stepped normalized collision energies of 20, 30, and 40%.

**Figure S3.** Extracted ion chromatograms (EICs) and MS1 and MS/MS spectra of  $N^1$ -acetylspermidine in human plasma (NIST SRM 1950) under conventional HILIC-MS and full HILIC-HDX-MS conditions. In HILIC-MS, the EIC at  $m/z$  188.1757, corresponding to  $[M(H_4)+H]^+$ , is displayed. Conversely, in HILIC-HDX-MS, the EIC at  $m/z$  193.2071, corresponding to  $[M(D_4)+D]^+$ , is shown. MS/MS spectra were acquired at stepped normalized collision energies of 20, 30, and 40%.

**Figure S4.** MS/MS spectra of (a) unknown metabolite (precursor ion  $m/z$  188.1757) in mouse feces extract, (b)  $N^1$ -acetylspermidine standard (precursor ion  $m/z$  188.1757), and (c)  $N^8$ -acetylspermidine standard (precursor ion  $m/z$  188.1757). MS/MS spectra were acquired at stepped normalized collision energies of 20, 30, and 40%.

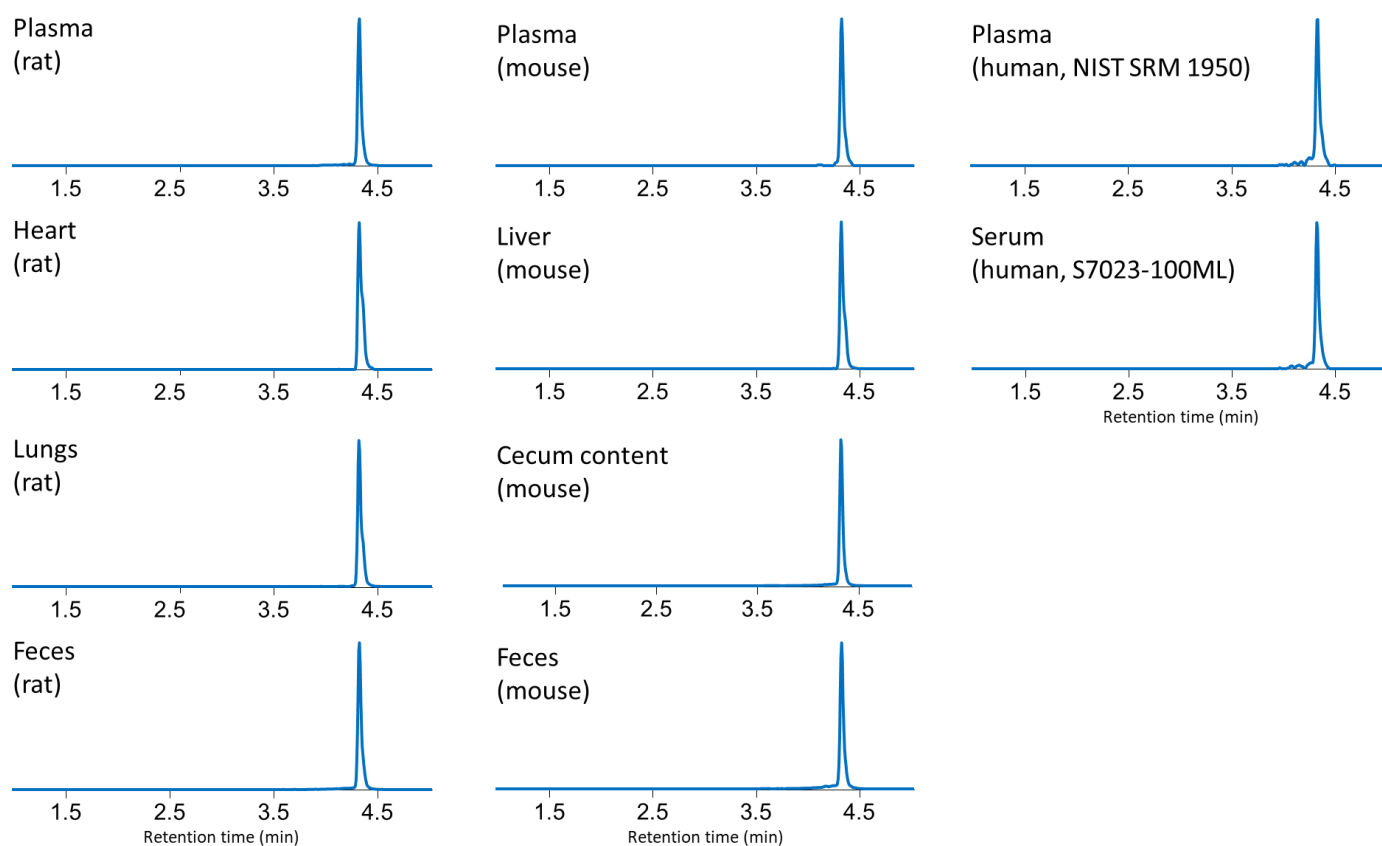

**Figure S1.** Extracted ion chromatograms of an unknown metabolite (4.3 min;  $m/z$  188.1757) detected in different biological matrices and of different origins (rat, mouse, human).

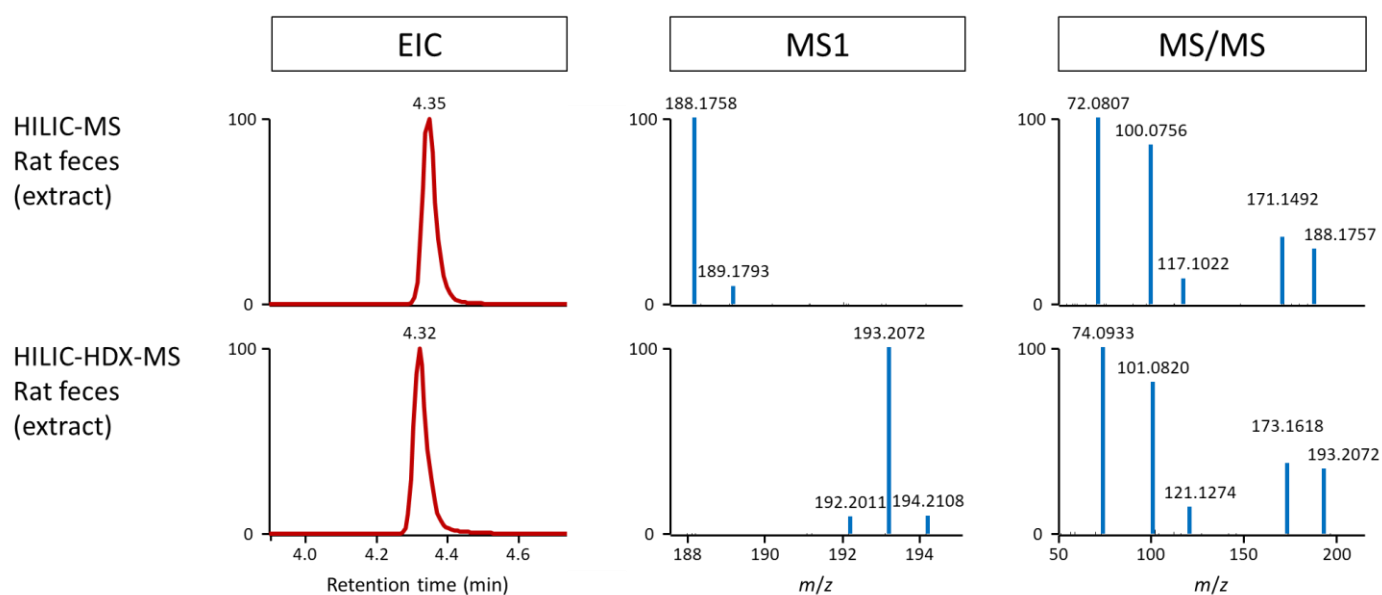

**Figure S2.** Extracted ion chromatograms (EICs) and MS1 and MS/MS spectra of *N*<sup>1</sup>-acetylspermidine in rat feces under conventional HILIC-MS and full HILIC-HDX-MS conditions. In HILIC-MS, the EIC at  $m/z$  188.1757, corresponding to  $[M(H_4)+H]^+$ , is displayed. Conversely, in HILIC-HDX-MS, the EIC at  $m/z$  193.2071, corresponding to  $[M(D_4)+D]^+$ , is shown. MS/MS spectra were acquired at stepped normalized collision energies of 20, 30, and 40%.

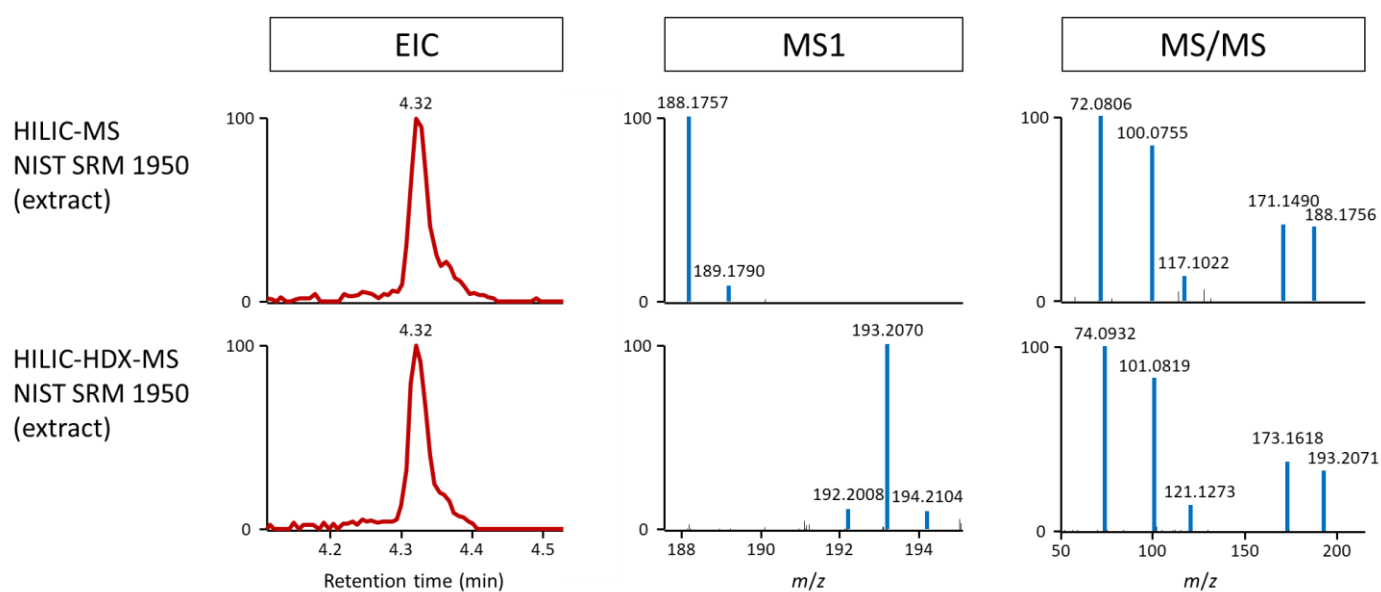

**Figure S3.** Extracted ion chromatograms (EICs) and MS1 and MS/MS spectra of *N*<sup>1</sup>-acetylspermidine in human plasma (NIST SRM 1950) under conventional HILIC-MS and full HILIC-HDX-MS conditions. In HILIC-MS, the EIC at  $m/z$  188.1757, corresponding to  $[M(H_4)+H]^+$ , is displayed. Conversely, in HILIC-HDX-MS, the EIC at  $m/z$  193.2071, corresponding to  $[M(D_4)+D]^+$ , is shown. MS/MS spectra were acquired at stepped normalized collision energies of 20, 30, and 40%.

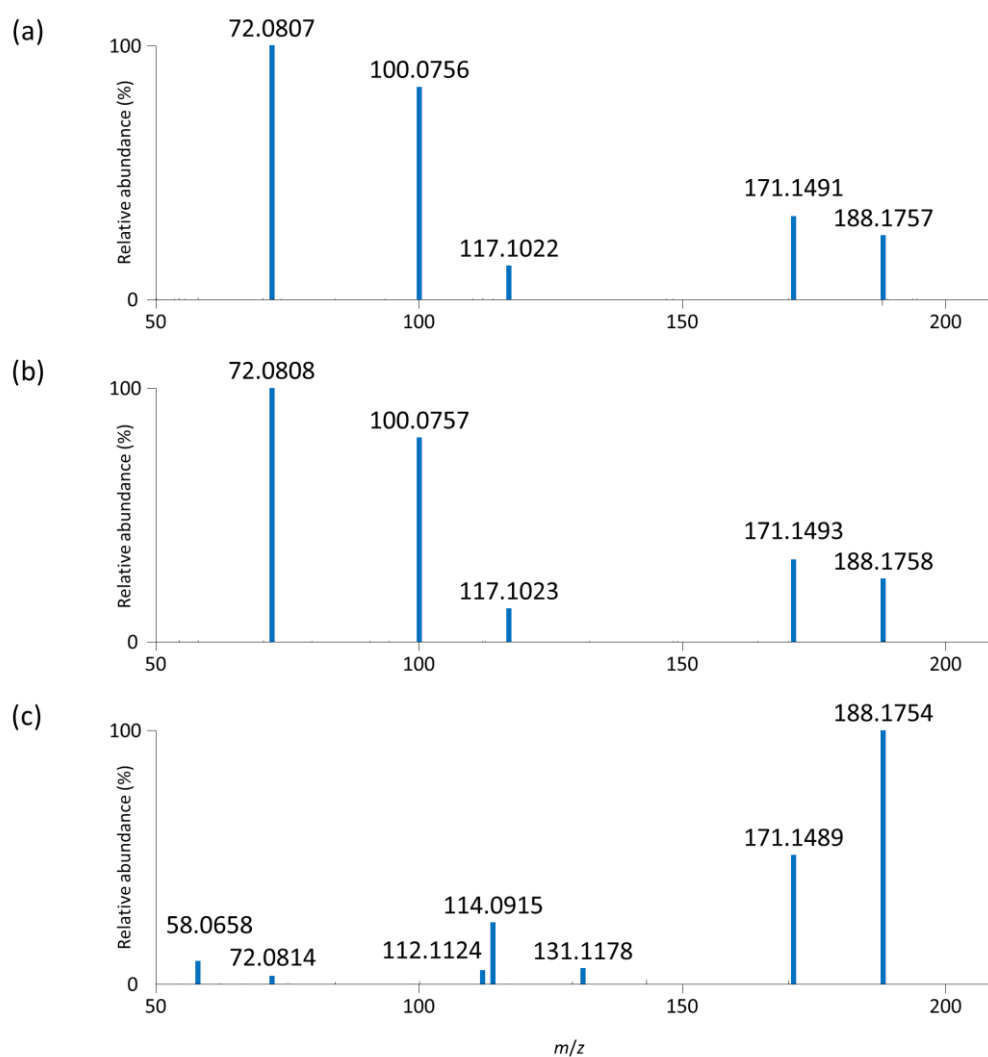

**Figure S4.** MS/MS spectra of (a) unknown metabolite (precursor ion  $m/z$  188.1757) in mouse feces extract, (b)  $N^1$ -acetylspermidine standard (precursor ion  $m/z$  188.1757), and (c)  $N^8$ -acetylspermidine standard (precursor ion  $m/z$  188.1757). MS/MS spectra were acquired at stepped normalized collision energies of 20, 30, and 40%.
