# Supplementary material for: Hydrophilic Interaction Liquid Chromatography–Hydrogen/Deuterium Exchange–Mass Spectrometry (HILIC-HDX-MS) for Untargeted Metabolomics
Source: Int J Mol Sci. 2024 Mar 1;25(5):2899. doi: 10.3390/ijms25052899 (PMC10932214; doi:10.3390/ijms25052899)
Supplement: Supplementary file 1 [file ijms-25-02899-s001.zip › N1-Acetylspermidine.msp]

NAME: N1-Acetylspermidine
PRECURSORMZ: 188.1757
PRECURSORTYPE: [M+H]+
IONMODE: Positive
INCHIKEY: MQTAVJHICJWXBR-UHFFFAOYSA-N
FORMULA: C9H21N3O
Num Peaks: 18
54.37982	230245
58.06546	490774
61.32953	171018
63.88415	143009
67.63344	141268
70.71528	316126
72.04436	1143854
72.08075	96322560
80.43997	161455
99.09171	195856
100.07567	80818192
112.112	707759
117.10226	13265991
131.25063	171118
148.21829	173323
170.16521	462675
171.14926	33782784
188.17581	28672396
