# Supplementary material for: Hydrophilic Interaction Liquid Chromatography–Hydrogen/Deuterium Exchange–Mass Spectrometry (HILIC-HDX-MS) for Untargeted Metabolomics
Source: Int J Mol Sci. 2024 Mar 1;25(5):2899. doi: 10.3390/ijms25052899 (PMC10932214; doi:10.3390/ijms25052899)
Supplement: Supplementary file 1 [file ijms-25-02899-s001.zip › N8-Acetylspermidine.msp]

NAME: N8-Acetylspermidine
PRECURSORMZ: 188.1757
PRECURSORTYPE: [M+H]+
IONMODE: Positive
INCHIKEY: FONIWJIDLJEJTL-UHFFFAOYSA-N
FORMULA: C9H21N3O
Num Peaks: 21
54.40074	117278
58.06584	6747596
58.06913	263843
61.99623	116176
62.2677	87574
66.45813	106736
72.04496	1382712
72.08141	2271717
75.09223	259732
84.08125	614016
99.09166	106178
100.07591	901796
112.11237	4072210
114.09153	17964516
117.10212	114324
129.13818	792142
131.11778	4555796
143.1179	1252594
170.16481	1029687
171.14891	37804952
188.17545	74292760
